# Supplementary material for: High-throughput bioprinting of spheroids for scalable tissue fabrication
Source: PubMed Central journal article supplement — Nat Commun. 2024 Nov 21;15:10083. doi: 10.1038/s41467-024-54504-7 (PMC11582690; doi:10.1038/s41467-024-54504-7), 2024-11-21
Supplement: 41467_2024_54504_MOESM2_ESM.pdf [file 41467_2024_54504_MOESM2_ESM.pdf]

## Description of Additional Supplementary Files

**File Name:** Supplementary Movie 1

**Description:** HITS-Bio software operation.

**File Name:** Supplementary Movie 2

**Description:** DCNA with non-coated vs. coated nozzles.

**File Name:** Supplementary Movie 3

**Description:** DCNA with intra-nozzle distance of 2.8 mm vs. 3.4 mm.

**File Name:** Supplementary Movie 4

**Description:** Single nozzle AAB vs. HITS-Bio for bioprinting of 64 spheroids.

**File Name:** Supplementary Movie 5

**Description:** Patterning of spheroids. Selectively patterned spheroids stained with DAPI (blue), F-Actin (red), and F-Actin (green) using the DCNA platform with various configurations.

**File Name:** Supplementary Movie 6

**Description:** HITS-Bio for bone tissue bioprinting. Video demonstrates bioprinted osteogenic spheroids with low (16 spheroids) and high densities (64 spheroids) using BONink.

**File Name:** Supplementary Movie 7

**Description:** HITS-Bio using CARink. Video demonstrates bioprinted spheroids with low (16 spheroids) and high densities (64 spheroids) on a transparent gel (CARTink) for clear visualization.

**File Name:** Supplementary Movie 8

**Description:** Intraoperative bioprinting (IOB) of bone tissue into critical-sized rat calvarial defects with BONink only, low-density (16 spheroids) and high-density (64 spheroids) groups. The process included EBB of the BONink, then deposition of miR-(196a-5p + 21) co-transfected osteogenic spheroids followed by another layer of BONink.

**File Name:** Supplementary Movie 9

**Description:** HITS-Bio for fabrication of 1 cm<sup>3</sup> cartilage constructs. The process took 40 min in total including the EBB of the CARink and HITS-Bio of miR-(140 + 21) co-transfected chondrogenic spheroids.
